# Supplementary material for: Prognostic Significance of ESR1 Amplification and ESR1 PvuII, CYP2C19*2, UGT2B15*2 Polymorphisms in Breast Cancer Patients
Source: PubMed Central journal article supplement (PMC3738574; doi:10.1371/journal.pone.0072219), 2013-08-08
Supplement: pone.0072219.s002.pdf [file pone.0072219.s002.pdf]

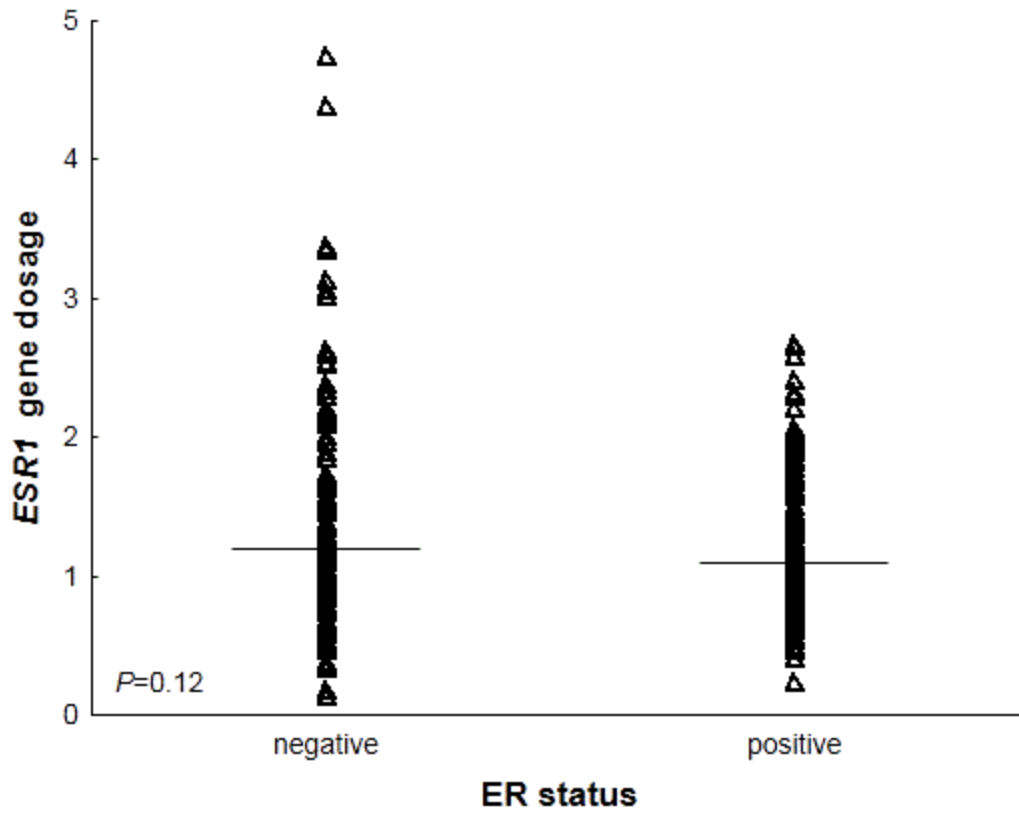

**Figure S1.** *ESR1* gene dosage in breast cancer samples according to ER status measured by IHC. Horizontal line indicates median value of *ESR1* gene dosage.
